# Supplementary material
Source: HighWire-hosted journal article supplement (https://bmjopenquality.bmj.com/highwire/filestream/135961/field_highwire_adjunct_files/2/ds4379.xls)
Supplement: ds4379.xls [file ds4379.xls]

## Sheet: pipha
id	RIOnumber	age	gender	admissiondate	admissiontime	clerkedby	q1	q2	q2other	q3	q4	q4other	q5	q6	q7	q8	q9	q10	q11	q12	q13	q14	q15	q16	q17	q18	q19	q19other
1	*	87	Female	2014-02-25	01:10	On Call	No	Patient Refused		Yes	N/A		No	No	No	N/A	No	Yes	No	Yes	Yes	Yes	Yes	Yes	Yes	48hours	N/A
2	*	93	Female	2014-02-21	16:57	Day Team	No	Other	On call doctor was due to fully clerk patient but was not able to come.	No	No Documented Reason		N/A	No	N/A	N/A	No	No	No	No	No	No	No	No	Yes	One week	N/A
3	*	70	Female	2014-02-20	1900-01-17 06:28:48	Day Team	Yes	N/A		N/A	N/A		N/A	No	No	N/A	Yes	Yes	Yes	Yes	Yes	Yes	Yes	Yes	Yes	24hours	N/A
4	*	73	Male	2014-02-15	1900-01-22 01:12:00	On Call	Yes	N/A		N/A	N/A		N/A	N/A	No	N/A	No	No	Partial	Yes	Yes	Yes	Yes	Yes	Yes	24hours	N/A
5	*	77	Male	07/02/14	23:19	On Call	Yes	N/A		N/A	N/A		N/A	N/A	No	N/A	Partial	No	Partial	Yes	Yes	Yes	No	No	Yes	72hours	N/A
6	*	91	Male	07/02/14	13:05	Day Team	Yes	N/A		N/A	N/A		N/A	N/A	No	N/A	Yes	Yes	Yes	Yes	Yes	Yes	Yes	Yes	Yes	72hours	N/A
7	*	66	Female	2013-12-07	21:31	On Call	Yes	N/A		N/A	N/A		N/A	No	No	N/A	No	Yes	Yes	Partial	Partial	Yes	No	No	Yes	24hours	N/A
8	*	53	Male	01/10/13	18:28	On Call	Yes	N/A		N/A	N/A		N/A	N/A	No	N/A	Yes	No	Partial	Yes	Yes	Yes	Yes	No	Yes	One week	N/A
9	*	62	Male	20/12/13	18:04	On Call	No	Other	Patient transferred to RBH for IV Abx for leg cellulitis	No	Other	Patient transferred to RBH for IV Abx for leg cellulitis	N/A	N/A	N/A	N/A	No	No	No	No	No	No	No	No	Yes	After one week	N/A
10	*	52	Female	05/01/14	10:30	On Call	Yes	N/A		N/A	N/A		N/A	N/A	Yes	Yes	Yes	Yes	Yes	Yes	Yes	Yes	Yes	Yes	Yes	72hours	N/A
11	*	48	Female	18/01/14	04:00	On Call	Yes	N/A		N/A	N/A		N/A	N/A	No	N/A	No	Yes	Yes	Partial	Yes	Yes	Yes	Yes	Yes	One week	N/A
12	*	61	Male	11/02/14	23:25	On Call	No	Patient Refused		No	No Documented Reason		No	N/A	N/A	N/A	No	Yes	Yes	No	No	No	No	No	Yes	72hours	N/A
13	*	33	Female	12/02/14	23:59	On Call	No	Other	"needs to be done once mentally stable and cooperative"	No	Patient Refused		No	N/A	N/A	N/A	No	No	Yes	No	No	No	No	No	Yes	48hours	N/A
14	*	47	Female	17/02/14	21:41	On Call	Yes	N/A		N/A	N/A		N/A	N/A	Yes	Yes	No	Yes	No	Yes	Yes	Yes	Yes	Yes	Yes	After one week	N/A
15	*	21	Female	02/03/14	22:34	On Call	Yes	N/A		N/A	N/A		N/A	N/A	No	N/A	No	Yes	Yes	Yes	Yes	Yes	Yes	Yes	Yes	24hours	N/A
16	*	44	Male	10/03/14	23:30	On Call	Yes	N/A		N/A	N/A		N/A	N/A	No	N/A	Yes	Yes	Yes	Yes	Yes	Yes	Yes	Yes	Yes	48hours	N/A
17	*	75	Female	29/01/14	1900-01-16 04:19:12	Day Team	Yes	N/A		N/A	N/A		No	No	No	N/A	Yes	No	No	Yes	Yes	Yes	Yes	Yes	Yes	24hours	N/A
18	*	73	Female	21/01/14	20:58	On Call	Yes	N/A		N/A	N/A		N/A	No	Yes	Yes	Yes	No	No	Yes	Yes	Yes	Yes	Yes	Yes	After one week	N/A
19	*	75	Male	14/01/14	21:28	On Call	Yes	N/A		N/A	N/A		N/A	N/A	No	N/A	Yes	Yes	Partial	Yes	Yes	Yes	Yes	Yes	Yes	48hours	N/A
20	*	80	Female	31/12/13	20:12	On Call	Yes	N/A		N/A	N/A		N/A	No	No	N/A	No	Yes	Partial	Yes	Yes	Yes	Yes	Yes	Yes	24hours	N/A
21	*	96	Female	19/12/14	23:51	On Call	Yes	N/A		N/A	N/A		N/A	No	No	N/A	Yes	Yes	No	Yes	Yes	Yes	Yes	Yes	Yes	24hours	N/A
22	*	24	Male	03/03/14	00:15	On Call	No	Other	Clinical Emergency	No	No Documented Reason		N/A	N/A	No	N/A	Yes	No	Yes	Yes	Yes	Yes	Yes	Yes	Yes	24hours	N/A
23	*	50	Male	2014-01-23	21:06	On Call	No	Patient Refused		No	Patient Refused		Yes	N/A	Yes	Yes	Yes	Yes	No	Yes	Yes	Yes	Yes	No	Yes	After one week	Patient Refused
24	*	22	Male	2014-03-09	17:01	On Call	Yes	N/A		N/A	N/A		N/A	N/A	No	N/A	No	Yes	Yes	Partial	Partial	Partial	Partial	Partial	Yes	72hours	N/A
25	*	31	Male	08/11/13	18:34	On Call	Yes	N/A		N/A	N/A		N/A	N/A	No	N/A	No	Yes	No	Partial	Partial	No	No	No	No	After one week	N/A
26	*	71	Male	24/01/14	23:08	On Call	Yes	N/A		N/A	N/A		N/A	N/A	No	N/A	Yes	Yes	Yes	Yes	Yes	Yes	Yes	Yes	Yes	24hours	N/A
27	*	20	Male	19/02/14	03:00	On Call	Yes	N/A		N/A	N/A		N/A	N/A	No	N/A	No	Yes	Yes	Partial	Partial	Partial	No	No	Yes	One week	N/A
28	*	32	Male	15/02/14	00:08	On Call	No	Patient Refused		No	Patient Refused		Yes	N/A	N/A	N/A	No	No	No	No	No	No	No	No	No	Not taken	Patient Refused
29	*	18	Male	04/02/14	16:11	Day Team	No	Patient Refused		No	Patient Refused		Yes	N/A	No	N/A	No	No	No	Yes	Yes	Yes	Yes	Yes	Yes	After one week	N/A
30	*	49	Male	12/01/14	22:50	On Call	No	Other	"clinic room busy"	No	No Documented Reason		N/A	N/A	No	N/A	Yes	Yes	Yes	Yes	Yes	Yes	Yes	Yes	Yes	After one week	N/A
31	*	48	Male	03/03/14	02:54	On Call	Yes	N/A		N/A	N/A		N/A	N/A	No	N/A	No	Yes	Yes	Yes	Partial	Partial	Yes	Partial	Yes	72hours	N/A
32	*	19	Female	03/03/14	08:11	On Call	Yes	N/A		N/A	N/A		N/A	N/A	Yes	Yes	No	Yes	Yes	Yes	Yes	Yes	Yes	Yes	No	Not taken	Recent in-hospital bloods
33	*	29	Female	27/12/13	11:08	Day Team	Yes	N/A		N/A	N/A		N/A	N/A	No	N/A	No	No	No	Yes	Yes	No	Yes	Yes	Yes	24hours	N/A
34	*	54	Female	18/02/14	20:30	On Call	Yes	N/A		N/A	N/A		N/A	N/A	No	N/A	Yes	No	Yes	Yes	Partial	Partial	Yes	Yes	Yes	Not taken	Recent in-hospital bloods
35	*	29	Female	08/02/14	22:12	On Call	Yes	N/A		N/A	N/A		N/A	N/A	No	N/A	No	No	Yes	Yes	Yes	Yes	Yes	Yes	Yes	24hours	N/A
36	*	29	Female	04/03/14	20:56	On Call	Yes	N/A		N/A	N/A		N/A	N/A	No	N/A	No	Yes	Yes	Partial	Partial	Yes	Partial	Partial	Yes	72hours	N/A
37	*	36	Female	2014-02-07	07:34	On Call	No	Patient Refused		No	No Documented Reason		No	N/A	N/A	N/A	No	No	No	No	No	No	No	No	Yes	After one week	Recent in-hospital bloods
38	*	21	Female	09/03/14	09:17	On Call	Yes	N/A		N/A	N/A		N/A	N/A	No	N/A	No	No	No	No	No	No	No	No	Yes	24hours	N/A
39	*	33	Female	04/02/13	20:00	On Call	No	Patient Refused		No	No Documented Reason		No	N/A	N/A	N/A	No	No	No	No	No	No	No	No	Yes	72hours	N/A
40	*	28	Female	14/02/14	22:23	On Call	No	Patient Refused		No	No Documented Reason		No	N/A	N/A	N/A	No	No	No	No	No	No	No	No	Yes	24hours	N/A
41	*	45	Female	28/12/13	23:59	On Call	Yes	N/A		N/A	N/A		N/A	N/A	No	N/A	Partial	No	No	Yes	Yes	Yes	Partial	Partial	No	Not taken	No Documented Reason
42	*	38	Female	30/01/14	04:19	On Call	No	No Documented Reason		No	No Documented Reason		No	N/A	N/A	N/A	No	No	No	No	No	No	No	No	Yes	After one week	Patient Refused
43	*	54	Male	03/03/14	22:36	On Call	Yes	N/A		N/A			N/A	N/A	No	N/A	Yes	Yes	Partial	Yes	Yes	Yes	Yes	No	Yes	After one week	N/A
44	*	20	Male	08/03/14	06:34	On Call	Yes	N/A		N/A	N/A		N/A	N/A	No	N/A	No	No	No	Partial	Partial	No	Partial	No	No	Not taken	Recent in-hospital bloods
45	*	35	Male	17/02/14	07:12	On Call	Yes	N/A		N/A	N/A		N/A	N/A	No	N/A	No	Yes	No	Partial	Partial	Yes	Partial	No	No	Not taken	No Documented Reason
46	*	27	Male	28/02/14	23:13	On Call	Yes	N/A		N/A	N/A		N/A	N/A	Yes	N/A	Yes	Yes	Partial	Yes	Yes	Yes	Yes	Yes	Yes	After one week	N/A
47	*	43	Male	28/02/14	04:12	On Call	Yes	N/A		N/A	N/A		N/A	N/A	No	N/A	No	No	No	Yes	Yes	Yes	Partial	Yes	Yes	After one week	N/A
48	*	29	Male	24/01/14	01:48	On Call	Yes	N/A		N/A	N/A		N/A	N/A	Yes	No	Yes	Yes	No	Yes	Yes	Yes	Yes	Yes	Yes	After one week	N/A
49	*	47	Male	10/01/14	06:29	On Call	No	No Documented Reason		No	No Documented Reason		No	N/A	N/A	N/A	No	No	No	No	No	No	No	No	No	Not taken	Patient Refused
50	*	25	Male	04/03/14	01:12	On Call	Yes	N/A		N/A	N/A		N/A	N/A	Yes	Yes	Yes	No	Partial	Yes	Yes	Partial	Yes	No	No	Not taken	Patient Refused
51	*	39	Male	05/02/14	01:16	On Call	Yes	N/A		N/A	N/A		N/A	N/A	Yes	N/A	No	Yes	Partial	Partial	Partial	Yes	Partial	No	No	Not taken	Patient Refused
52	*	41	Male	09/12/13	21:10	On Call	No	No Documented Reason		No	No Documented Reason		N/A	N/A	N/A	N/A	No	No	No	No	No	No	No	No	No	Not taken	No Documented Reason
53	*	31	Male	21/02/14	20:17	On Call	Yes	N/A		N/A	N/A		N/A	N/A	No	N/A	No	No	No	Yes	Yes	Yes	Partial	No	Yes	After one week	N/A
54	*	49	Male	22/01/14	00:31	On Call	Yes	N/A		N/A	N/A		N/A	N/A	No	N/A	No	No	No	Partial	Partial	Partial	Yes	Yes	Yes	Not taken	Recent in-hospital bloods
55	*	33	Male	23/01/14	20:22	On Call	Yes	N/A		N/A	N/A		N/A	N/A	No	N/A	No	No	No	Yes	Yes	Yes	Yes	Yes	Yes	After one week	N/A
56	*	36	Male	21/01/14	17:28	Day Team	Yes	N/A		N/A	N/A		N/A	N/A	Yes	No	Yes	Yes	Partial	Yes	Yes	Yes	Yes	Yes	Yes	After one week	N/A
57	*	35	Male	10/03/14	01:06	On Call	No	Other	seclusion	No	No Documented Reason		N/A	N/A	N/A	N/A	No	No	Yes	No	No	No	No	No	Yes	24hours	N/A
58	*	19	Female	16/11/13	03:32	On Call	Yes	N/A		N/A	N/A		N/A	N/A	No	N/A	Yes	Yes	Yes	Yes	Partial	Yes	Yes	Yes	No	Not taken	Patient Refused
59	*	35	Male	2014-03-16	07:16	On Call	Yes	N/A		N/A	N/A		N/A	N/A	Yes	Yes	No	Yes	Yes	Yes	Yes	Yes	Yes	Yes	Yes	72hours	N/A
60	*	22	Male	03/01/14	15:21	Day Team	No	Patient Refused		Yes	N/A		N/A	N/A	No	N/A	Yes	Yes	Yes	Yes	Yes	Yes	Partial	Yes	Yes	One week	N/A
61	*	60	Male	07/03/14	04:54	On Call	Yes	N/A		N/A	N/A		N/A	N/A	No	N/A	Yes	No	Partial	Yes	Yes	Yes	No	No	No	Not taken	No Documented Reason
62	*	29	Female	05/02/14	02:14	On Call	Yes	N/A		N/A	N/A		N/A	N/A	Yes	Yes	Yes	Yes	Partial	Yes	Yes	Yes	Yes	Yes	Yes	24hours	N/A
63	*	28	Female	05/11/13	17:45	On Call	Yes	N/A		N/A	N/A		N/A	N/A	No	N/A	No	No	No	Yes	Yes	Partial	Yes	Partial	Yes	One week	N/A
64	*	20	Female	08/01/14	03:41	On Call	Yes	N/A		N/A	N/A		N/A	N/A	No	N/A	Yes	No	No	Yes	No	Partial	Partial	No	No	Not taken	No Documented Reason
65	*	48	Female	22/12/13	17:56	On Call	Yes	N/A		N/A	N/A		N/A	N/A	No	N/A	No	No	No	Yes	Yes	No	Yes	Yes	Yes	After one week	N/A
66	*	51	Female	15/01/14	01:43	On Call	No	Patient Refused		No	No Documented Reason		No	N/A	N/A	N/A	No	No	No	No	No	No	No	No	Yes	24hours	N/A
67	*	25	Female	2013-10-01	05:49	On Call	No	Other	Patient asleep	No	No Documented Reason	The patient was transferred from the RBH ans she has complex physical health issues.	No	N/A	N/A	N/A	No	No	No	No	No	No	No	No	No	Not taken	Recent in-hospital bloods
68	*	20	Female	26/02/14	20:59	On Call	No	Patient Refused		No	No Documented Reason		Yes	N/A	N/A	N/A	No	No	No	No	No	No	No	No	Yes	24hours	N/A
69	*	59	Female	06/02/14	08:36	On Call	Yes	N/A		N/A			N/A	N/A	Yes	Yes	Yes	Yes	Partial	Yes	Yes	Yes	Yes	Yes	Yes	24hours	N/A
70	*	21	Male	03/03/14	06:29	On Call	Yes	N/A		N/A			N/A	N/A	No	N/A	No	Yes	No	Yes	Yes	Yes	Yes	Yes	No	Not taken	Recent in-hospital bloods
71	*	58	Male	05/03/14	22:46	On Call	Yes	N/A		N/A			N/A	N/A	Yes	No	Yes	Yes	Partial	Partial	No	Yes	No	No	Yes	24hours	N/A
72	*	50	Male	04/03/14	22:41	On Call	Yes	N/A		N/A			N/A	N/A	No	N/A	Yes	No	Partial	Yes	Yes	Yes	Partial	No	No	Not taken	Recent in-hospital bloods
73	*	45	Male	12/12/13	15:34	Day Team	Yes	N/A	Patient later became aggressive during physical examination, unable to complete all.	N/A			N/A	N/A	No	N/A	Partial	No	No	Yes	Yes	Yes	Partial	No	Yes	After one week	N/A
74	*	38	Male	18/12/14	04:15	On Call	No	Patient Refused		No	No Documented Reason		Yes	N/A	N/A	N/A	No	No	No	No	No	No	No	No	Yes	After one week	N/A
75	*	28	Male	15/01/14	16:03	Day Team	No	Patient Refused		No	No Documented Reason		No	N/A	N/A	N/A	No	No	No	No	No	No	No	No	Yes	After one week	N/A
76	*	21	Male	27/02/14	16:36	Day Team	Yes	N/A		N/A			N/A	N/A	No	N/A	No	No	No	Yes	Yes	Yes	Yes	Yes	No	Not taken	Patient Refused
77	*	44	Male	04/11/13	19:45	On Call	Yes	N/A		N/A			N/A	N/A	No	N/A	Partial	No	No	Yes	Yes	No	Yes	No	Yes	One week	N/A
78	*	23	Male	14/01/14	08:25	On Call	No	Other	handover	Yes			N/A	N/A	No	N/A	Partial	No	No	Yes	Yes	Yes	Yes	Yes	Yes	24hours	N/A
79	*	53	Male	23/08/13	22:23	On Call	No	Patient Refused		No	No Documented Reason		No	N/A	N/A	N/A	No	No	No	No	No	No	No	No	Yes	24hours	N/A
80	*	39	Male	22/12/13	20:40	On Call	Yes	N/A		N/A			N/A	N/A	No	N/A	Partial	Yes	No	Yes	Yes	Yes	Yes	Yes	Yes	24hours	N/A
81	*	43	Female	08/03/14	11:11	On Call	No	No Documented Reason		No	No Documented Reason		No	N/A	N/A	N/A	No	No	No	No	No	No	No	No	No	N/A	Recent in-hospital bloods
82	*	28	Male	01/03/14	00:10	On Call	No	Patient Refused		No	Patient Refused		Yes	N/A	N/A	N/A	No	No	No	No	No	No	No	No	No	Not taken	Patient Refused
83	*	26	Male	04/03/14	14:32	Day Team	No	Patient Refused		No	No Documented Reason		Yes	N/A	N/A	N/A	No	No	No	No	No	No	No	No	Yes	One week	N/A
84	*	44	Male	03/01/14	01:50	On Call	Yes	N/A		N/A			N/A	N/A	No	N/A	No	No	Partial	Yes	Yes	Yes	Yes	Yes	No	Not taken	No Documented Reason
85	*	75	Female	04/10/13	16:26	Day Team	Yes	N/A		Yes	N/A		N/A	No	No	N/A	Yes	Yes	Yes	Yes	Yes	Yes	Yes	Yes	Yes	One week	N/A
86	*	77	Female	24/09/12	1900-01-15 06:57:36	Day Team	Yes	N/A		N/A	N/A		N/A	No	No	N/A	Yes	No	No	Yes	Yes	Yes	No	No	Yes	24hours	N/A
87	*	87	Female	24/02/14	1900-01-16 09:07:12	Day Team	Yes	N/A		N/A	N/A		N/A	No	No	N/A	No	No	Partial	Yes	Yes	Yes	No	No	Yes	After one week	N/A
88	*	88	Female	21/08/13	1899-12-31 01:40:48	On Call	Yes	N/A		N/A	N/A		N/A	No	No	N/A	No	No	No	Yes	Yes	Yes	Yes	Yes	Yes	After one week	N/A
89	*	84	Female	26/02/13	22:13	On Call	No	No Documented Reason		Yes	N/A		No	No	No	N/A	No	Yes	No	Yes	Yes	Yes	No	No	Yes	24hours	N/A
90	*	81	Female	30/05/12	19:46	On Call	Yes	Patient Refused		Yes	N/A		No	No	No	N/A	Yes	Yes	No	Yes	Yes	No	Yes	Yes	Yes	24hours	N/A
91	*	67	Female	08/03/14	11:48	On Call	Yes	N/A		N/A	N/A		N/A	No	No	N/A	No	No	Yes	Yes	Yes	No	No	No	Yes	24hours	N/A
92	*	78	Male	05/03/14	21:57	On Call	Yes	N/A		N/A	N/A		N/A	N/A	No	N/A	No	Yes	No	Yes	Yes	Yes	Yes	Yes	Yes	24hours	N/A
93	*	69	Female	2014-03-05	01:33	On Call	Yes	N/A		N/A	N/A		N/A	No	No	No	No	No	Partial	Yes	Yes	Yes	No	No	Yes	24hours	N/A
94	*	66	Male	04/02/14	10:13	Day Team	Yes	Patient Refused		No	No Documented Reason		No	N/A	N/A	N/A	No	No	No	No	No	No	No	No	Yes	48hours	N/A
95	*	60	Male	28/01/14	19:59	On Call	Yes	N/A		N/A	N/A		N/A	N/A	No	N/A	Yes	Yes	No	Yes	Yes	Yes	Yes	Yes	Yes	After one week	N/A
96	*	77	Female	23/01/14	16:43	Day Team	Yes	N/A		N/A	N/A		N/A	No	No	N/A	No	Yes	Partial	Yes	Yes	Yes	Yes	Yes	Yes	24hours	N/A
97	*	84	Female	14/01/14	16:33	Day Team	Yes	Other	Lack of co-operation	No	No Documented Reason		No	No	N/A	N/A	No	No	No	No	No	No	No	No	Yes	After one week	N/A
98	*	67	Male	13/12/13	21:34	On Call	Yes	No Documented Reason		No	Other	lack of co-operation	No	N/A	N/A	N/A	No	No	No	No	No	No	No	No	Yes	After one week	N/A
99	*	89	Male	10/12/13	16:12	Day Team	Yes	N/A		N/A	N/A		N/A	N/A	No	N/A	Yes	No	No	Yes	Yes	Yes	Yes	Yes	Yes	72hours	N/A
100	*	67	Male	01/06/12	15:25	Day Team	Yes	N/A		N/A	N/A		N/A	N/A	No	N/A	No	No	No	Yes	Yes	No	No	No	Yes	After one week	N/A
101	*	77	Male	08/03/14	04:45	On Call	Yes	N/A		N/A	N/A		N/A	N/A	No	N/A	No	No	No	Yes	Yes	Yes	Yes	Yes	Yes	One week	N/A
102	*	63	Male	22/02/14	02:07	On Call	Yes	Other	"Too mentall unwell to be examined"	No	No Documented Reason		No	N/A	N/A	N/A	No	No	No	No	No	No	No	No	Yes	One week	N/A
103	*	87	Female	08/02/14	00:42	On Call	Yes	N/A		N/A	N/A		N/A	N/A	No	N/A	Partial	No	No	Yes	Yes	Yes	No	No	Yes	24hours	N/A
104	*	89	Male	18/12/13	05:41	On Call	Yes	Other	Asleep	Yes	N/A		No	N/A	No	N/A	Yes	No	No	Yes	Yes	Yes	Yes	Yes	Yes	24hours	N/A
105	*	55	Male	03/02/14	00:41	On Call	Yes	N/A		N/A	N/A		N/A	N/A	No	N/A	No	No	Yes	Yes	Yes	Yes	Yes	Yes	Yes	48hours	N/A
106	*	22	Female	06/03/14	21:53	On Call	Yes	N/A		N/A	N/A		N/A	N/A	Yes	Yes	No	Yes	Yes	Yes	Yes	Yes	Yes	Yes	Yes	24hours	N/A
107	*	23	Male	16/02/14	00:30	On Call	No	Other	"Patient too hostile"	No	No Documented Reason		N/A	N/A	N/A	N/A	No	No	Yes	No	No	No	No	No	Yes	One week	N/A
108	*	34	Male	14/01/14	22:20	On Call	Yes	N/A		N/A	N/A		N/A	N/A	No	N/A	No	Yes	Yes	Yes	Yes	Yes	Yes	Partial	Yes	72hours	N/A
109	*	27	Male	16/02/14	22:19	On Call	No	Patient Refused		No	Other	Unsafe to examine	Yes	N/A	No	N/A	Yes	Yes	Yes	Partial	Yes	Yes	Partial	Partial	Yes	After one week	N/A
110	*	20	Male	09/02/14	02:05	On Call	No	N/A		N/A	N/A		N/A	N/A	No	N/A	No	Yes	Yes	No	Yes	No	Partial	Yes	No	Not taken	No Documented Reason
111	*	38	Female	30/11/13	23:27	On Call	No	Patient Refused		No	No Documented Reason		Yes	N/A	No	N/A	No	No	Yes	Yes	Yes	No	No	No	Yes	After one week	N/A
